# Supplementary material
Source: publisher figshare collection journal article supplement (https://frontiersin.figshare.com/ndownloader/files/25726922)

**Fig S1.** Electron microscope image of *Kluyvera sichuanensis* 090646<sup>T</sup>. Cell morphology was examined by an H-7650 transmission electron microscope (Hitachi; Tokyo, Japan). Cells were 1.0–2.0  $\mu\text{m}$  long and 0.5–0.8  $\mu\text{m}$  wide in diameter.

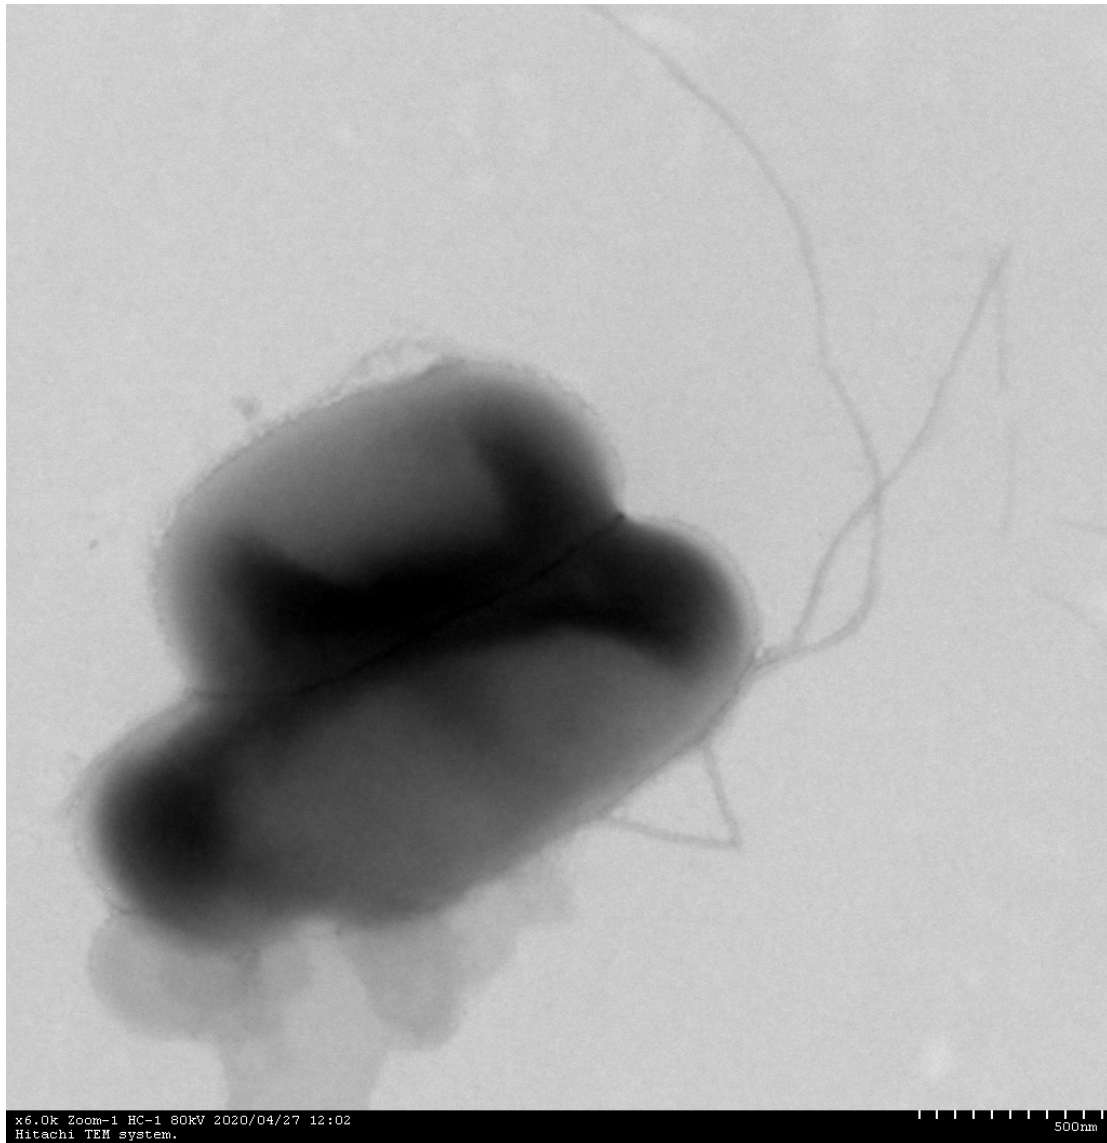

Supplement: Supplementary file [file 25726922]
